# Supplementary material
Source: publisher figshare collection journal article supplement (https://acs.figshare.com/ndownloader/files/17475596)
Supplement: Supplementary file 1 [file 17475596]

Supporting Information for

**Flexible and tough cellulose nanocrystal/polycaprolactone hybrid aerogel based on the strategy of macromolecule crosslinking via click chemistry**

Ling Zhou,<sup>†</sup> Yuan-Ming Zhai,<sup>‡</sup> Ming-Bo Yang,<sup>†</sup> and Wei Yang<sup>\*,†</sup>

<sup>†</sup>College of Polymer Science and Engineering, Sichuan University, State Key Laboratory of Polymer Materials Engineering, No. 24 South Section 1 Yihuan Road, Chengdu, Sichuan, 610065, P. R. China

<sup>‡</sup>Analytical & Testing Centre, Sichuan University, No. 24 South Section 1 Yihuan Road, Chengdu, Sichuan, 610065, P. R. China

\*Corresponding author. Tel.: + 86 28 8546 0130; fax: + 86 28 8546 0130.

E-mail address: weiyang@scu.edu.cn (Wei Yang).

Supporting information consists of 7 pages, 1 Table and 9 figures.

**Table S1.** CNC-PCL composite aerogels with different concentrations of PCL-N and volume of DMF

| Sample     | CNC-C | PCL-N | Vol <sub>DMF</sub> |
|------------|-------|-------|--------------------|
| CP0.1      | 1     | 0.1   | 100                |
| CP0.25     | 1     | 0.25  | 100                |
| CP0.5      | 1     | 0.5   | 100                |
| CP0.25-60  | 1     | 0.25  | 60                 |
| CP0.25-140 | 1     | 0.25  | 140                |

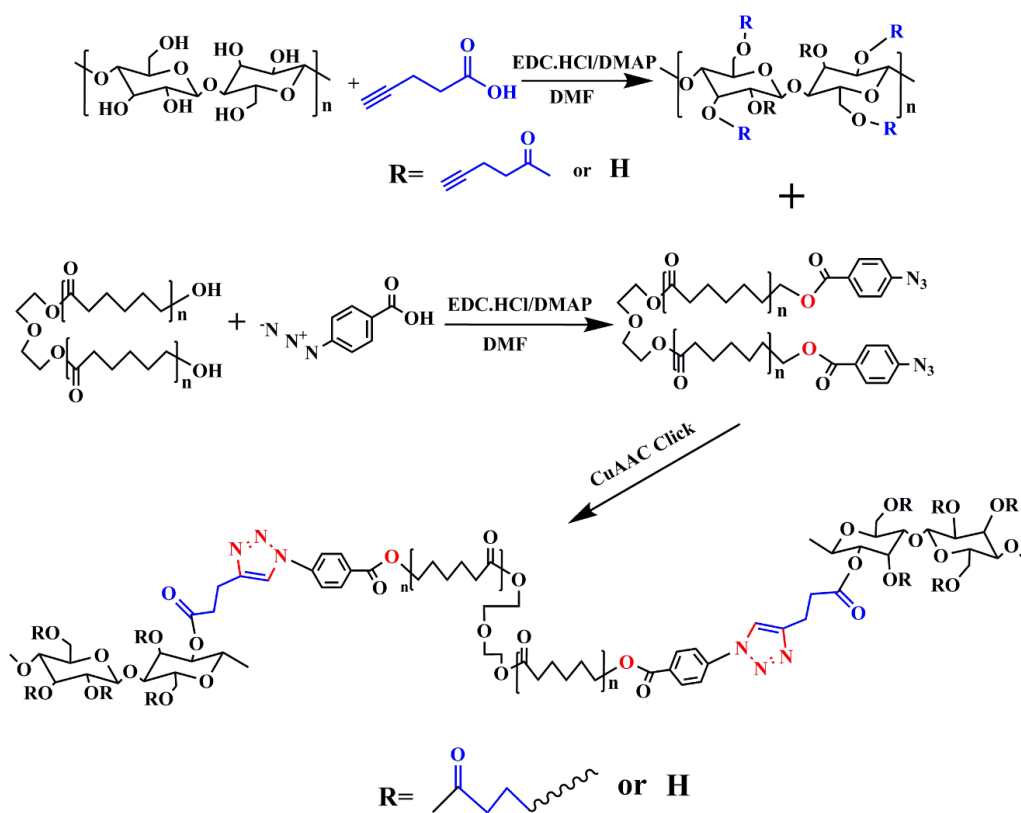

**Figure S1.** The chemical synthesis route of CNC-PCL aerogel

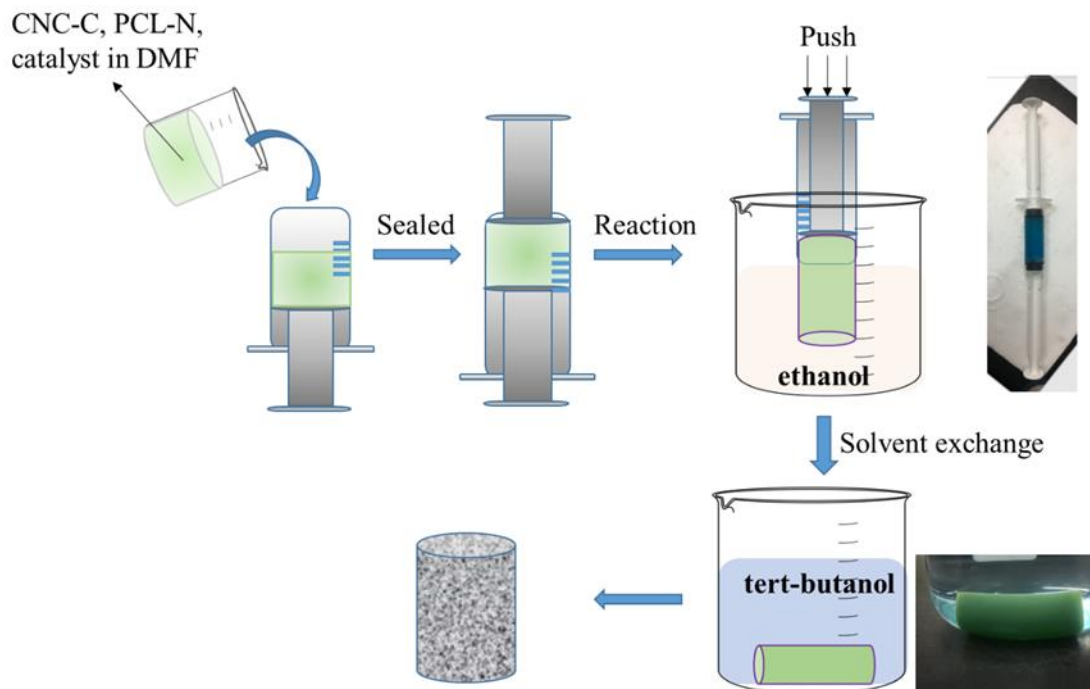

**Figure S2.** The preparation procedure of CNC-PCL aerogel

Equation for calculating the surficial hydroxyl groups

$$Rs = 2 \left( \frac{d_{110}}{L1} + \frac{d_{\bar{1}\bar{1}0}}{L2} \right)$$

Where Rs represents the ratio of the surficial hydroxyl groups,  $d_{110}$  and  $d_{\bar{1}\bar{1}0}$  represents the plane spacing of each of the crystal planes perpendicular to the faces of the crystal. For cellulose type I $\beta$ , the planes (110) corresponding to 0.61 nm are parallel to the long side of the rectangular whisker section whereas the 0.54 nm (110) are parallel to the short side. L1 and L2 represent the height and width of the nanocrystal respectively<sup>1</sup>.

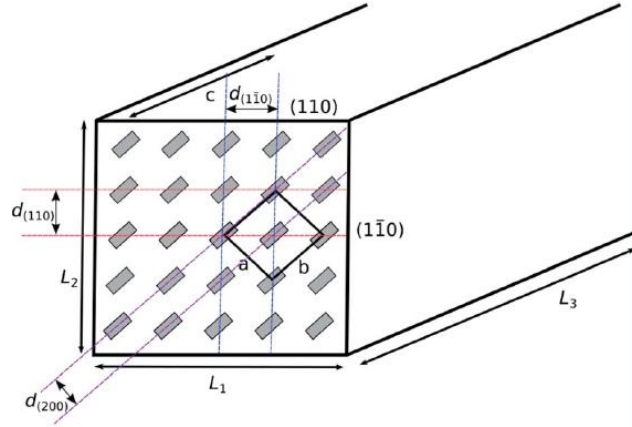

**Figure S3.** Model representation of a cellulose nanocrystal with cellulose chain ends in grey. The unit cell is depicted, along with the crystal planes exposed at the edges of the nanocrystal <sup>1</sup>

If we know the average diameter of CNCs (code as  $d$ ) and consider  $L_1$  and  $L_2$  both equal to  $d$ , the ratio of the surficial hydroxyl groups

$$Rs = 2 \left( \frac{0.54}{d} + \frac{0.61}{d} \right) = \frac{2.3}{d}$$

In addition, the fact that most reactions on cellulose nanocrystals have a reported  $DS < 1.5$  (completely surficial  $DS = 3$ ) of surface hydroxyl due to the crystal structure of CNCs where one C6, one C2 and one C3 hydroxyl point out of the face of the crystal for every two AGUs <sup>2</sup>. Therefore, the ratio of the reactive surficial hydroxyl groups can be calculated as below

$$Rr = \frac{Rs}{2} = \frac{1.15}{d}$$

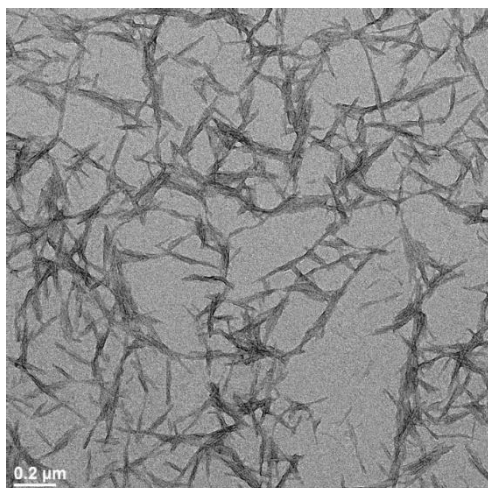

**Figure S4.** TEM image of the used CNCs providing by the manufacturer BLUE GOOSE BIOREFINERIES INC. Canada

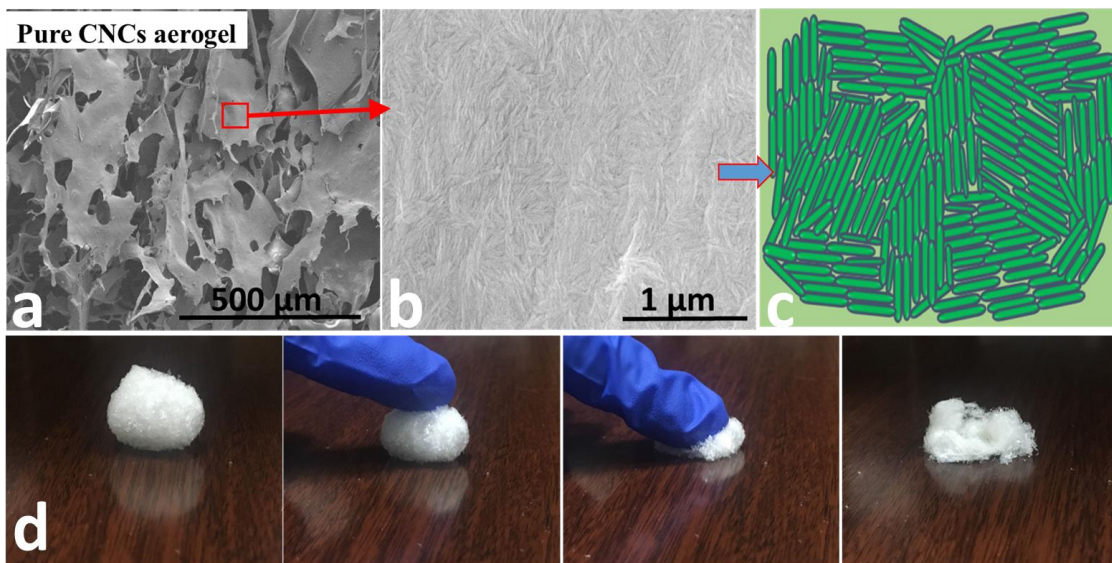

**Figure S5.** SEM images (a, b) of pure CNC aerogel obtained from freeze-drying from water and its construction scheme (c), and the digital images of its brittleness under compression

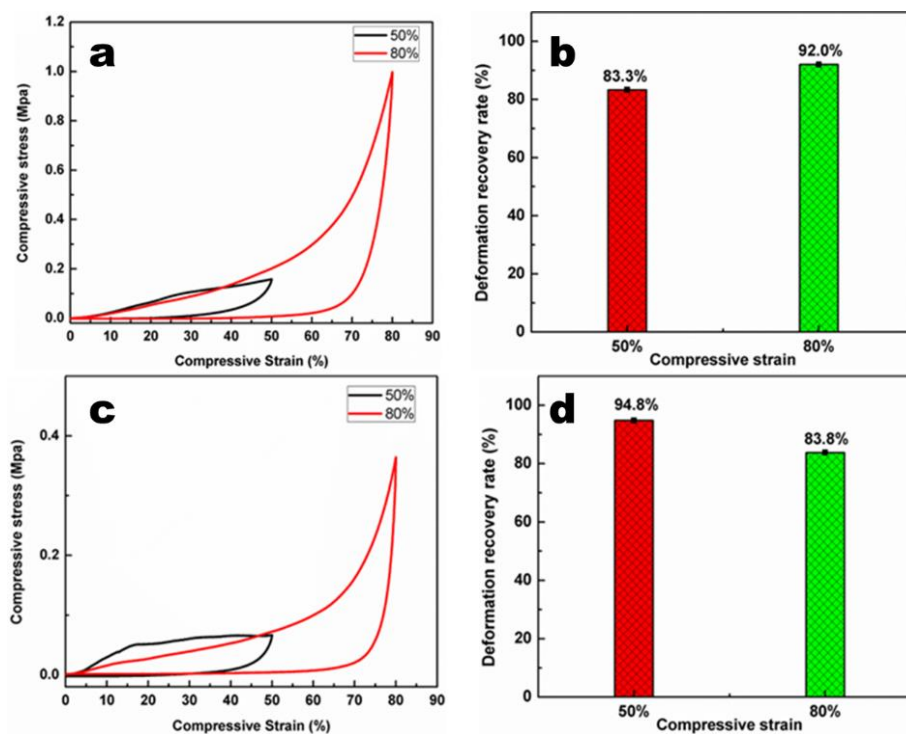

**Figure S6.** Typical tensile properties of CP-0.25-60 (a, b), and CP-0.25-140 (c, d) aerogels

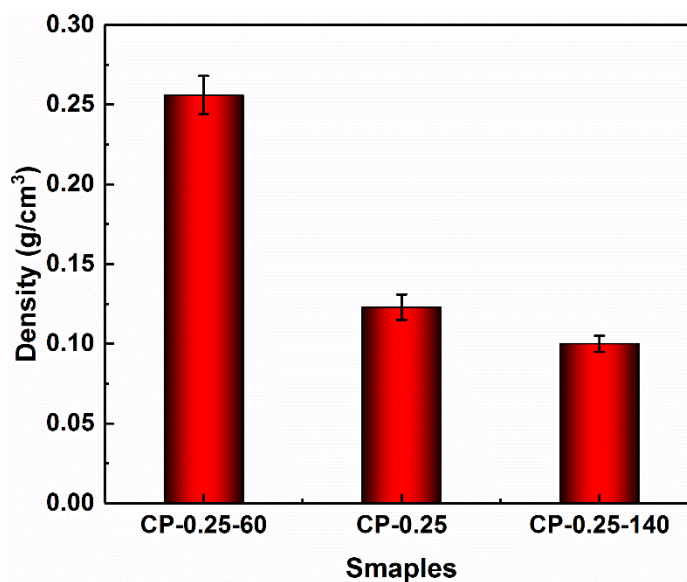

**Figure S7.** Density of CP-0.25 aerogels with various system concentrations

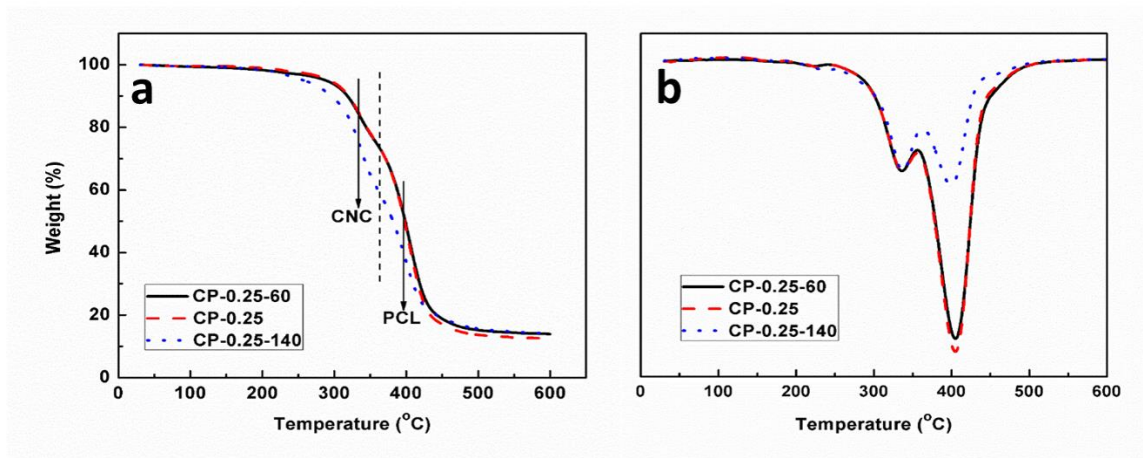

**Figure S8.** TGA (a) and DTG (b) of CNC-PCL aerogels with various system concentration

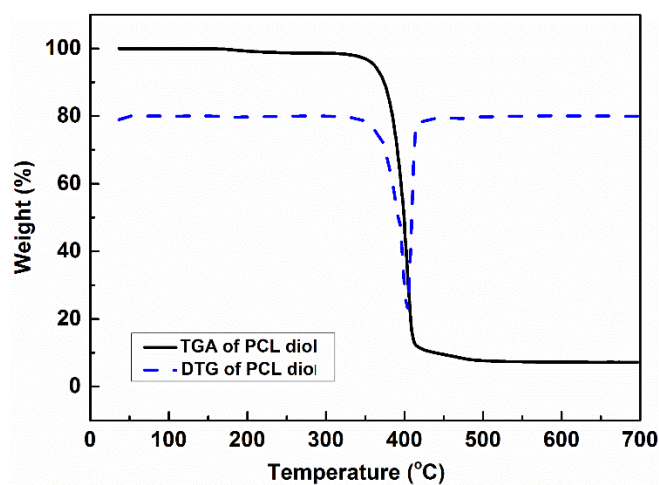

**Figure S9.** The TGA and DTG curves of PCL diol

### Reference:

- (1) Habibi, Y.; Chanzy, H.; Vignon, M. R. TEMPO-mediated surface oxidation of cellulose whiskers. *Cellulose* **2006**, *13* (6), 679-687.
- (2) Eyley, S.; Thielemans, W. Surface modification of cellulose nanocrystals. *Nanoscale* **2014**, *6* (14), 7764-7779.
